# Supplementary material for: An overview of technical considerations when using quantitative real-time PCR analysis of gene expression in human exercise research
Source: PubMed Central journal article supplement (PMC5944930; doi:10.1371/journal.pone.0196438), 2018-05-10
Supplement: pone.0196438.s001.pdf [file pone.0196438.s001.pdf]

S1 Table:

Individual data for RNA concentration and quality in Experiment 1

| Sample          | RNA concentration (ng/ $\mu$ l) | RNA yield (ng RNA per mg muscle) | RQI  | RQI classification | $A_{260}/A_{280}$ | $A_{260}/A_{230}$ |
|-----------------|---------------------------------|----------------------------------|------|--------------------|-------------------|-------------------|
| Good Practice 1 | 197.50                          | 318.5                            | 8.00 | Pass               | 1.85              | 0.58              |
| Good Practice 2 | 280.50                          | 480.9                            | 8.10 | Pass               | 1.80              | 1.22              |
| Good Practice 3 | 340.00                          | 505.0                            | 8.60 | Pass               | 1.84              | 1.09              |
| Good Practice 4 | 278.50                          | 397.9                            | 9.40 | Pass               | 1.80              | 1.20              |
| Thaw 1          | 185.00                          | 430.2                            | 7.80 | Pass               | 1.68              | 1.52              |
| Thaw 2          | 215.50                          | 659.7                            | 7.80 | Pass               | 1.74              | 0.33              |
| Thaw 3          | 268.50                          | 676.9                            | 8.50 | Pass               | 1.79              | 1.00              |
| Thaw 4          | 119.00                          | 324.5                            | 8.40 | Pass               | 1.56              | 1.29              |
| Free thaw 1     | 225.50                          | 697.4                            | 8.20 | Pass               | 1.75              | 0.96              |
| Free thaw 2     | 166.50                          | 675.0                            | 8.20 | Pass               | 1.69              | 0.38              |
| Free thaw 3     | 259.50                          | 949.4                            | 9.00 | Pass               | 1.77              | 0.80              |
| Free thaw 4     | 246.50                          | 859.9                            | 8.90 | Pass               | 1.84              | 1.34              |
