# Supplementary material for: An overview of technical considerations when using quantitative real-time PCR analysis of gene expression in human exercise research
Source: PubMed Central journal article supplement (PMC5944930; doi:10.1371/journal.pone.0196438), 2018-05-10
Supplement: pone.0196438.s002.pdf [file pone.0196438.s002.pdf]

S2 Table:

Individual data for RNA concentration and quality in Experiment 2

| Sample             | RNA concentration (ng/ $\mu$ l) | RNA yield (ng RNA per mg muscle) | RQI  | RQI classification | $A_{260}/A_{280}$ | $A_{260}/A_{230}$ |
|--------------------|---------------------------------|----------------------------------|------|--------------------|-------------------|-------------------|
| Trizol 1           | 308.00                          | 616.0                            | 9.30 | Pass               | 1.68              | 0.51              |
| Trizol 2           | 392.00                          | 683.7                            | 8.00 | Pass               | 1.77              | 0.37              |
| Trizol 3           | 542.00                          | 1084.0                           | 9.10 | Pass               | 1.80              | 0.27              |
| Trizol 4           | 318.50                          | 682.5                            | 8.80 | Pass               | 1.70              | 0.52              |
| Kit + 2-propanol 1 | 197.50                          | 318.5                            | 8.00 | Pass               | 1.85              | 0.58              |
| Kit + 2-propanol 2 | 280.50                          | 480.9                            | 8.10 | Pass               | 1.80              | 1.22              |
| Kit + 2-propanol 3 | 340.00                          | 505.0                            | 8.60 | Pass               | 1.84              | 1.09              |
| Kit + 2-propanol 4 | 278.50                          | 397.9                            | 9.40 | Pass               | 1.80              | 1.20              |
| Kit + Ethanol 1    | 30.50                           | 59.0                             | 4.20 | Not Passed         | 1.13              | 0.60              |
| Kit + Ethanol 2    | 40.50                           | 122.7                            | 8.90 | Pass               | 1.07              | 0.29              |
| Kit + Ethanol 3    | 22.00                           | 71.0                             | 9.20 | Pass               | 0.75              | 0.06              |
| Kit + Ethanol 4    | 24.00                           | 98.6                             | 8.40 | Pass               | 0.77              | 0.34              |
