# Supplementary material for: An overview of technical considerations when using quantitative real-time PCR analysis of gene expression in human exercise research
Source: PubMed Central journal article supplement (PMC5944930; doi:10.1371/journal.pone.0196438), 2018-05-10
Supplement: pone.0196438.s003.pdf [file pone.0196438.s003.pdf]

S3 Table 3:

Individual data for RNA concentration and quality in Experiment 3

| Sample          | RNA concentration (ng/ $\mu$ l) | RQI  | RQI classification | $A_{260}/A_{280}$ | $A_{260}/A_{230}$ |
|-----------------|---------------------------------|------|--------------------|-------------------|-------------------|
| Intact RNA 1    | 197.5                           | 8.00 | Pass               | 1.85              | 0.58              |
| Intact RNA 2    | 280.5                           | 8.10 | Pass               | 1.80              | 1.22              |
| Intact RNA 3    | 340.0                           | 8.60 | Pass               | 1.84              | 1.09              |
| Intact RNA 4    | 278.5                           | 9.40 | Pass               | 1.80              | 1.20              |
| Degraded RNA 1  | 236.5                           | 7.90 | Pass               | 2.18              | 0.59              |
| Degraded RNA 2  | 330.0                           | 8.40 | Pass               | 1.97              | 1.15              |
| Degraded RNA 3  | 369.0                           | 8.30 | Pass               | 1.90              | 1.01              |
| Degraded RNA 4  | 311.0                           | 8.80 | Pass               | 1.87              | 1.11              |
| RNase treated 1 | 96.0                            | N/A  | Not Passed         | 1.86              | 0.33              |
| RNase treated 2 | 128.5                           | N/A  | Not Passed         | 1.86              | 1.56              |
