# Supplementary material for: An overview of technical considerations when using quantitative real-time PCR analysis of gene expression in human exercise research
Source: PubMed Central journal article supplement (PMC5944930; doi:10.1371/journal.pone.0196438), 2018-05-10
Supplement: pone.0196438.s004.pdf [file pone.0196438.s004.pdf]

S4 Table:

Raw data for Cyclophilin and PGC-1 $\alpha$  primer amplification efficiency test

|                                  | C <sub>q</sub> Value |       |       |       |        | Slope | Efficiency | Efficiency % | R <sup>2</sup> |
|----------------------------------|----------------------|-------|-------|-------|--------|-------|------------|--------------|----------------|
| cDNA copy                        | 1                    | 0.1   | 0.01  | 0.001 | 0.0001 |       |            |              |                |
| Log (cDNA copy)                  | 0                    | -1    | -2    | -3    | -4     |       |            |              |                |
| <i>Cyclophilin</i>               | 21.70                | 24.77 | 28.35 | 32.22 | 34.54  | -3.31 | 2.00       | 100.44       | 0.99           |
| <i>PGC-1 <math>\alpha</math></i> | 20.46                | 23.37 | 27.28 | 30.72 | 32.90  | -3.22 | 2.04       | 104.37       | 0.99           |
| $\Delta C_q$                     | 1.24                 | 1.40  | 1.07  | 1.50  | 1.64   | -0.09 |            |              |                |
