# Supplementary material for: An overview of technical considerations when using quantitative real-time PCR analysis of gene expression in human exercise research
Source: PubMed Central journal article supplement (PMC5944930; doi:10.1371/journal.pone.0196438), 2018-05-10
Supplement: pone.0196438.s005.pdf [file pone.0196438.s005.pdf]

S5 Table:

Raw data for primer efficiency test in Experiment 4

|                                 | Cq    |       |       |       |        | Slope | Efficiency | Efficiency % | R <sup>2</sup> |
|---------------------------------|-------|-------|-------|-------|--------|-------|------------|--------------|----------------|
| cDNA copy                       | 1     | 0.1   | 0.01  | 0.001 | 0.0001 |       |            |              |                |
| Log (cDNA copy)                 | 0     | -1    | -2    | -3    | -4     |       |            |              |                |
| <i>GAPDH</i>                    | 18.37 | 20.52 | 24.28 | 27.27 | 30.92  | -3.19 | 2.06       | 106.01       | 0.99           |
| <i>B2M</i>                      | 19.03 | 21.58 | 25.30 | 28.81 | 32.25  | -3.37 | 1.98       | 98.15        | 1.00           |
| <i>Cyclophilin</i>              | 21.70 | 24.77 | 28.35 | 32.22 | 34.54  | -3.31 | 2.00       | 100.44       | 0.99           |
| <i>18s rRNA</i>                 | 9.15  | 11.94 | 15.60 | 19.02 | 22.33  | -3.34 | 1.99       | 99.12        | 1.00           |
| <i>PGC-1<math>\alpha</math></i> | 20.46 | 23.37 | 27.28 | 30.72 | 32.90  | -3.22 | 2.04       | 104.37       | 0.99           |

|                 | Cq    |        |         |         |         | Slope | Efficiency | Efficiency % | R <sup>2</sup> |
|-----------------|-------|--------|---------|---------|---------|-------|------------|--------------|----------------|
| cDNA copy       | 1     | 0.5    | 0.25    | 0.125   | 0.0625  |       |            |              |                |
| Log (cDNA copy) | 0     | -0.301 | -0.6021 | -0.9031 | -1.2041 |       |            |              |                |
| <i>ACTB</i>     | 27.30 | 28.30  | 29.41   | 30.53   | 30.96   | -3.17 | 2.07       | 106.71       | 0.98           |
| <i>TBP</i>      | 27.34 | 28.44  | 29.69   | 30.70   | 31.25   | -3.34 | 1.99       | 99.09        | 0.98           |
