# Supplementary material for: An overview of technical considerations when using quantitative real-time PCR analysis of gene expression in human exercise research
Source: PubMed Central journal article supplement (PMC5944930; doi:10.1371/journal.pone.0196438), 2018-05-10
Supplement: pone.0196438.s006.pdf [file pone.0196438.s006.pdf]

S6 Table:

Raw  $C_q$  value of six commonly-used reference genes in Experiment 4

| <b>TBP</b>  | Timepoints (Hours) |       |       |
|-------------|--------------------|-------|-------|
| Participant | Baseline           | 0     | 3     |
| 1           | 28.55              | 26.40 | 25.53 |
| 2           | 25.11              | 25.93 | 25.84 |
| 3           | 25.21              | 25.14 | 25.56 |
| 4           | 25.90              | 26.94 | 26.35 |
| 5           | 26.58              | 26.87 | 25.84 |
| 6           | 25.76              | 25.56 | 26.27 |
| 7           | 27.88              | 26.80 | 28.15 |
| 8           | 26.84              | 26.67 | 26.00 |
| 9           | 26.08              | 26.64 | 26.24 |

| <b>ACTB</b>  | Timepoints (Hours) |       |       |
|--------------|--------------------|-------|-------|
| Participants | Baseline           | 0     | 3     |
| 1            | 26.09              | 23.95 | 22.37 |
| 2            | 22.85              | 23.01 | 21.77 |
| 3            | 22.74              | 21.43 | 22.13 |
| 4            | 23.02              | 23.41 | 23.98 |
| 5            | 24.19              | 24.39 | 23.38 |
| 6            | 23.24              | 22.82 | 23.10 |
| 7            | 24.95              | 23.74 | 23.61 |
| 8            | 23.86              | 22.80 | 23.07 |
| 9            | 24.44              | 23.75 | 23.70 |

| <b>B2M</b>  | Timepoints (Hours) |       |       |
|-------------|--------------------|-------|-------|
| Participant | Baseline           | 0     | 3     |
| 1           | 24.50              | 22.23 | 21.40 |
| 2           | 21.29              | 20.83 | 20.52 |
| 3           | 20.98              | 20.35 | 20.58 |
| 4           | 21.37              | 21.09 | 21.63 |
| 5           | 21.09              | 21.43 | 21.14 |
| 6           | 21.54              | 21.08 | 20.70 |
| 7           | 22.55              | 21.78 | 22.08 |
| 8           | 21.40              | 20.73 | 20.65 |
| 9           | 21.39              | 21.47 | 21.12 |

| <b>Cyclophilin</b> | Timepoints (Hours) |       |       |
|--------------------|--------------------|-------|-------|
| Participants       | Baseline           | 0     | 3     |
| 1                  | 30.58              | 28.36 | 28.22 |
| 2                  | 26.05              | 27.19 | 26.37 |
| 3                  | 27.29              | 26.18 | 26.42 |
| 4                  | 26.42              | 28.48 | 28.32 |
| 5                  | 27.76              | 27.87 | 28.09 |
| 6                  | 26.41              | 26.71 | 27.22 |
| 7                  | 28.87              | 29.26 | 29.65 |
| 8                  | 27.50              | 28.11 | 27.84 |
| 9                  | 27.92              | 28.25 | 28.56 |

| <b>GAPDH</b> | Timepoints (Hours) |       |       |
|--------------|--------------------|-------|-------|
| Participant  | Baseline           | 0     | 3     |
| 1            | 23.29              | 21.45 | 19.91 |
| 2            | 19.28              | 18.97 | 20.47 |
| 3            | 18.91              | 19.18 | 19.08 |
| 4            | 20.33              | 20.88 | 21.04 |
| 5            | 21.63              | 21.82 | 20.49 |
| 6            | 20.33              | 20.83 | 21.45 |
| 7            | 22.34              | 21.07 | 22.70 |
| 8            | 20.78              | 20.67 | 20.09 |
| 9            | 20.41              | 19.83 | 21.33 |

| <b>18S</b>   | Timepoints (Hours) |       |       |
|--------------|--------------------|-------|-------|
| Participants | Baseline           | 0     | 3     |
| 1            | 15.70              | 13.20 | 12.28 |
| 2            | 11.80              | 11.34 | 12.30 |
| 3            | 11.08              | 11.91 | 11.00 |
| 4            | 12.24              | 12.57 | 13.27 |
| 5            | 12.56              | 13.01 | 11.83 |
| 6            | 11.76              | 11.98 | 11.89 |
| 7            | 13.52              | 12.58 | 13.53 |
| 8            | 12.21              | 11.71 | 11.77 |
| 9            | 12.63              | 10.89 | 12.37 |
