# Supplementary material for: An overview of technical considerations when using quantitative real-time PCR analysis of gene expression in human exercise research
Source: PubMed Central journal article supplement (PMC5944930; doi:10.1371/journal.pone.0196438), 2018-05-10
Supplement: pone.0196438.s007.pdf [file pone.0196438.s007.pdf]

S7 Table:

Raw data for determination of cDNA amount in Experiment 5

| RNA input<br>( $\mu\text{g}$ ) | cDNA<br>content<br>(A.U.) | Mean | SD   |
|--------------------------------|---------------------------|------|------|
| 1                              | 2.97                      | 2.90 | 0.10 |
| 1                              | 2.90                      |      |      |
| 1                              | 2.77                      |      |      |
| 1                              | 2.97                      |      |      |
| 0.5                            | 2.01                      | 1.98 | 0.08 |
| 0.5                            | 2.07                      |      |      |
| 0.5                            | 1.96                      |      |      |
| 0.5                            | 1.89                      |      |      |
| 0.25                           | 1.57                      | 1.44 | 0.10 |
| 0.25                           | 1.38                      |      |      |
| 0.25                           | 1.35                      |      |      |
| 0.25                           | 1.46                      |      |      |
| 0                              | 1.06                      | 1.01 | 0.03 |
| 0                              | 0.99                      |      |      |
| 0                              | 1.01                      |      |      |
| 0                              | 0.98                      |      |      |
| 1 (-RT)                        | 2.64                      | 2.55 | 0.14 |
| 1 (-RT)                        | 2.71                      |      |      |
| 1 (-RT)                        | 2.42                      |      |      |
| 1 (-RT)                        | 2.45                      |      |      |
