# Supplementary material for: An overview of technical considerations when using quantitative real-time PCR analysis of gene expression in human exercise research
Source: PubMed Central journal article supplement (PMC5944930; doi:10.1371/journal.pone.0196438), 2018-05-10
Supplement: pone.0196438.s008.pdf [file pone.0196438.s008.pdf]

S8 Table:

Raw  $C_q$  value for *PGC-1 $\alpha$*  mRNA and cDNA content in Experiment 6

$C_q$  value for *PGC-1 $\alpha$*

| <b><i>PGC-1<math>\alpha</math></i></b> | Timepoints (Hours) |       |       |
|----------------------------------------|--------------------|-------|-------|
| Participants                           | Baseline           | 0     | 3     |
| 1                                      | 24.41              | 22.54 | 20.08 |
| 2                                      | 21.46              | 21.58 | 20.02 |
| 3                                      | 22.13              | 21.92 | 19.04 |
| 4                                      | 22.44              | 22.96 | 21.05 |
| 5                                      | 23.12              | 23.41 | 20.95 |
| 6                                      | 21.68              | 21.85 | 21.92 |
| 7                                      | 24.37              | 23.83 | 22.19 |
| 8                                      | 23.35              | 24.15 | 21.33 |
| 9                                      | 22.06              | 23.65 | 20.86 |

cDNA content measured by OliGreen dye

| <b><i>cDNA content</i></b> | Timepoints (Hours) |      |      |
|----------------------------|--------------------|------|------|
| Participants               | Baseline           | 0    | 3    |
| 1                          | 0.27               | 1.27 | 2.42 |
| 2                          | 3.39               | 3.17 | 3.73 |
| 3                          | 3.63               | 3.46 | 3.86 |
| 4                          | 2.41               | 2.05 | 2.61 |
| 5                          | 2.71               | 2.90 | 2.80 |
| 6                          | 2.90               | 2.86 | 2.35 |
| 7                          | 1.48               | 2.43 | 2.40 |
| 8                          | 1.75               | 2.17 | 2.46 |
| 9                          | 3.30               | 3.55 | 3.67 |
