# Supplementary material for: An overview of technical considerations when using quantitative real-time PCR analysis of gene expression in human exercise research
Source: PLoS One. 2018 May 10;13(5):e0196438. doi: 10.1371/journal.pone.0196438 (PMC5944930; doi:10.1371/journal.pone.0196438)
Supplement: S9 Table — (XLSX) [file pone.0196438.s009.xlsx]

## Sheet: Sheet1
S9 Table:
Raw data for correlation analysis between relative gene expression and A260/A230 ratio
Sample	A260/A230			Cq						Δ Cq						Expression
		ACTB	TBP	Cyclophilin	GAPDH	B2M	18S	ACTB	TBP	Cyclophilin	GAPDH	B2M	18S	ACTB	TBP	Cyclophilin	GAPDH	B2M	18S
1	0.51	24.2902	26.4773	23.7713	23.2228	24.7068	15.1044	1.63362	4.2582	1.01104	0.352832	2.13362	-9.38931	0.322279	0.052258	0.496189	0.783045	0.227886	670.601
2	0.37	24.0385	25.3715	22.4072	22.1669	23.5105	14.2169	2.50386	4.10354	0.546372	0.257967	1.87024	-9.28199	0.176304	0.0581715	0.68474	0.836266	0.273528	622.525
3	0.27	23.8931	25.0891	22.3558	22.5363	23.9715	14.3255	2.23752	3.67263	0.392688	0.609314	2.3315	-9.24364	0.212051	0.0784204	0.761709	0.655508	0.198678	606.196
4	0.52	23.18	25.1536	22.0622	22.3597	23.7635	13.9159	1.72908	4.09731	0.387621	0.744689	2.42923	-9.38793	0.301644	0.0584235	0.764389	0.596796	0.185665	669.959
5	0.58	24.8561	27.2685	24.25	23.3516	24.5601	14.4542	2.07922	4.97404	1.35195	0.273857	1.72401	-10.4031	0.236643	0.0318174	0.391761	0.827105	0.302706	1354.07
6	1.22	24.7481	26.3861	23.0284	22.5064	23.4587	14.8361	2.70493	4.67056	0.641304	0.0149592	1.15772	-9.18947	0.153368	0.0392665	0.641133	0.989685	0.448221	583.855
7	1.09	23.3287	24.9237	22.1342	21.468	23.2347	12.37	2.5026	4.41658	1.06912	0.269778	2.3898	-10.6479	0.176458	0.046825	0.476608	0.829447	0.190809	1604.47
8	1.2	22.6867	24.6929	21.8306	22.0856	23.4318	13.3115	1.6162	4.02361	0.588865	0.894954	2.51038	-9.63401	0.326194	0.0614853	0.664866	0.537765	0.175509	794.561
9	0.6	24.7012	27.5758	24.1857	22.9863	24.7195	14.7093	1.86593	5.31536	1.24727	-0.19198	1.88779	-10.1244	0.274347	0.025114	0.421245	1.14233	0.27022	1116.2
10	0.29	23.4687	25.8939	22.6021	21.0268	23.4234	13.1884	2.24181	5.152	1.20188	-0.688499	2.18742	-10.0946	0.211421	0.0281251	0.434708	1.61161	0.219544	1093.4
11	0.06	24.322	26.0466	23.5173	21.9441	24.3603	14.2715	2.29401	4.36355	1.32845	-0.559447	2.33998	-9.76653	0.203908	0.0485782	0.398196	1.4737	0.197513	871.003
12	0.34	23.5528	25.8644	22.6485	22.2323	23.9073	13.8105	1.86018	4.63415	0.775062	0.27563	2.28555	-9.83058	0.275441	0.04027	0.584364	0.82609	0.205107	910.54
13	1.52	24.8795	27.1012	23.99	23.4772	24.4627	14.3286	2.20759	4.8736	1.14018	0.524758	1.70738	-10.4535	0.216496	0.0341115	0.453703	0.695076	0.306215	1402.23
14	0.33	24.3203	26.6667	23.0629	22.7864	23.689	14.5677	2.1658	4.9814	0.656861	0.325045	1.40823	-9.53733	0.222859	0.0316554	0.634257	0.798273	0.376775	743.06
15	1	23.8429	25.2224	22.6023	21.5062	23.9955	12.48	2.68159	4.33707	1.19286	-0.122373	2.86472	-10.9539	0.15587	0.0494781	0.437435	1.08852	0.137288	1983.54
16	1.29	23.8257	25.7036	22.7605	22.5152	23.7953	13.6503	2.14071	4.39424	0.862432	0.568137	2.10422	-10.0697	0.226768	0.0475556	0.550025	0.674487	0.232578	1074.72
17	0.96	24.227	25.6692	23.0424	21.9627	24.181	13.7098	2.51394	4.24463	1.09249	-0.203195	2.4588	-10.1067	0.175077	0.0527518	0.468951	1.15125	0.181898	1102.58
18	0.38	24.3397	25.6524	22.527	22.3605	23.8969	13.9984	2.65273	4.22794	0.47738	0.277621	2.12127	-9.75694	0.159019	0.053366	0.718281	0.82495	0.229844	865.23
19	0.8	24.3715	25.5821	22.801	22.1363	23.8684	14.1047	2.67299	4.12573	0.788405	-0.0092802	2.0693	-9.64715	0.156801	0.0572836	0.578984	1.00645	0.238275	801.829
20	1.34	23.5325	26.0141	22.7837	23.0343	24.0151	14.4241	1.47825	4.45611	0.5797	0.880377	2.0574	-9.45183	0.358924	0.0455593	0.669103	0.543225	0.240249	700.301
